# Supplementary material for: β-Lactamase Producing Escherichia coli Encoding blaCTX-M and blaCMY Genes in Chicken Carcasses from Egypt
Source: MDPI journal article supplement (doi:10.3390/foods12030598), 2023-02-01
Supplement: s1 [file s1]

## Supplementary file

### Figure legends for the Supplementary figures

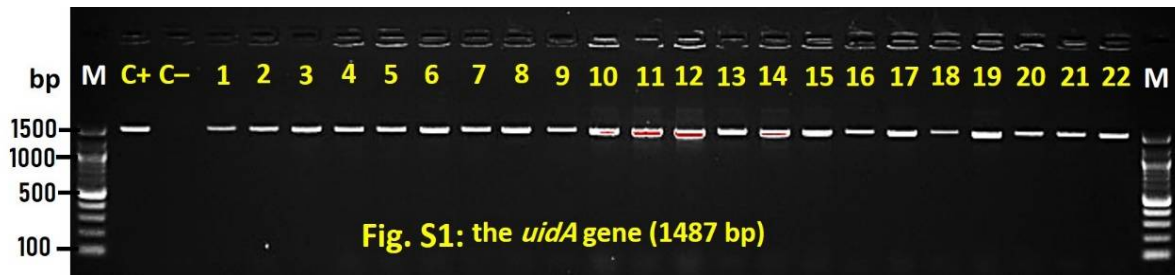

**Figure S1:** A representative agarose gel electrophoresis showing the amplified DNA product of the *uidA* gene (the marker gene for *E. coli*) at the expected molecular weight of 1487 bp. Genomic DNA from *E. coli* isolates was used as a template.

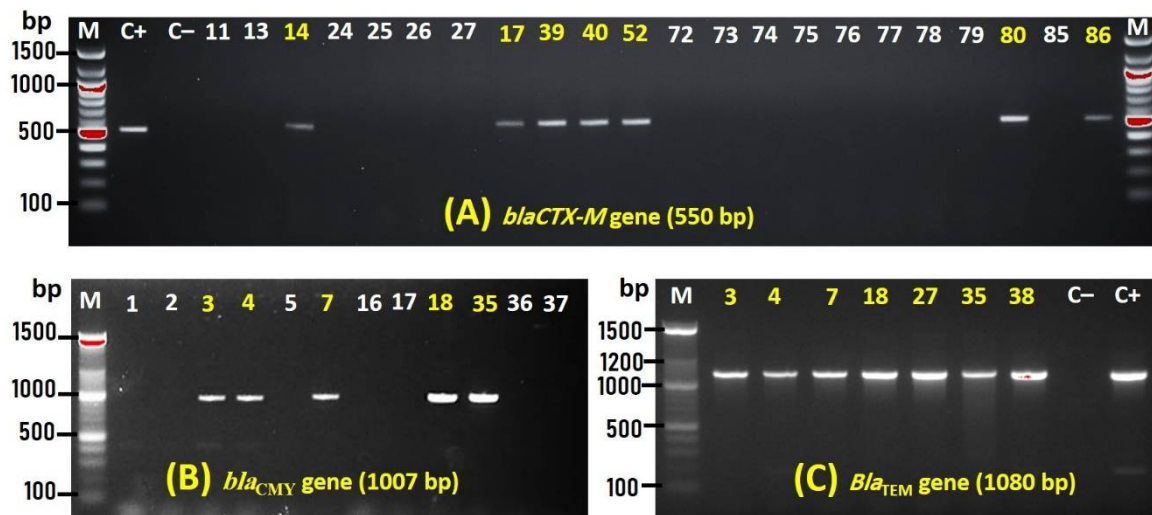

**Figure S2:** A representative agarose gel electrophoresis for the PCR-amplified DNA products of the  $\beta$ -lactamase encoding genes *bla*<sub>CTX-M</sub> (A), *bla*<sub>CMY</sub> (B), and *bla*<sub>TEM</sub> (C), at the expected molecular weight of 550, 1007, and 1080 bp, respectively.

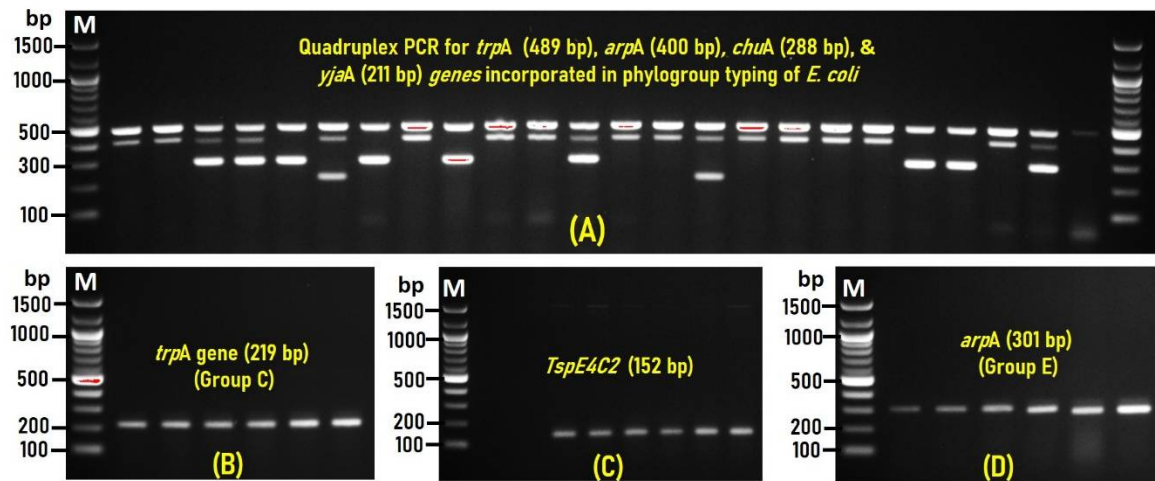

**Figure S3:** A representative agarose gel electrophoresis for the PCR-amplified genes incorporated in the phylogroup typing of the confirmed *E. coli* strains. (A): The *trpA* (internal control), *arpA*, *chuA*, and *yjaA* were amplified as quadruplex PCR and determined at the expected molecular sizes of 489, 400, 288, and 211 bp, respectively. Agarose gel electrophoresis of a singleplex-PCR for the amplification of (B) *trpA* (group C), (C) *TspE4C2*, and (D) *arpA* (group E) which were verified at the expected molecular size of 219, 152, and 301 pb, respectively.
